# Supplementary material for: Biogeography of planktonic bacterial communities across the whole Mediterranean Sea
Source: Copernicus journal article supplement (doi:10.5194/os-9-585-2013), 2013-07-08
Supplement: Supplementary file 1 [file Legend of supplementary Tables and Figure.pdf › SUPPLEMENTARY FIGURES AND TABLES/Legend of supplementary Tables and Figure.pdf]

**Table S1.** List of the samples analyzed for prokaryotic abundance and/or bacterioplankton community composition, reporting the corresponding available spatial and physico-chemical characteristics.

**Table S2.** Total number of OTUs and Shannon index of the samples analyzed by ARISA fingerprinting at the University of Milan.

**Figure S1. Sections of salinity in the Mediterranean Sea 1 from the Meteor cruise M84/3.**

The top left panel shows the Mediterranean Sea map with the hydrographic stations sampled during the cruise (red dots), stations sampled by the University of Milan for epi- and bathypelagic waters (green dots) and stations sampled by IEO at a finer scale in the vertical profiles (black circles). The top right panel is a meridional section from the Adriatic Sea to the Ionian Sea (shown as a light gray line on the map). The lower panel is the zonal section from the coast of Lebanon in the Eastern Mediterranean Sea to the Strait of Gibraltar (shown as a dark gray line on the map). The depth and color scales are identical for both panels, where the top 500 m in each section is slightly expanded and the collected samples are marked by green stars (University of Milan dataset) and black circles (IEO dataset).
