# Supplementary material for: Biogeography of planktonic bacterial communities across the whole Mediterranean Sea
Source: Copernicus journal article supplement (doi:10.5194/os-9-585-2013), 2013-07-08
Supplement: Supplementary file 2 [file Mapelli et al, Supplementary Tables S1 and S2.pdf › SUPPLEMENTARY FIGURES AND TABLES/Mapelli et al, Supplementary Tables S1 and S2.pdf]

| Station | Depth<br>(m) | Longitude<br>(E) | Latitude<br>(N) | Pressure | Salinity | Temperature<br>(°C) | Oxygen<br>(μmol/kg) | Prokaryotic abundance<br>(cells/l) | ARISA<br>fingerprinting | PO <sub>4</sub><br>(μmol/kg) | NO <sub>3</sub> +NO <sub>2</sub><br>(μmol/kg) |
|---------|--------------|------------------|-----------------|----------|----------|---------------------|---------------------|------------------------------------|-------------------------|------------------------------|-----------------------------------------------|
| 287     | 799          | 25,6             | 37,66           | 806,8    | 39,09    | 14,51               | 210,6               | 7,40E+07                           | -                       | 0,06                         | 1,19                                          |
| 288     | 2273         | 26,21            | 35,65           | 2302,6   | 39,05    | 14,36               | 208,8               | 6,85E+07                           | -                       | 0,13                         | 3,77                                          |
| 289     | 10           | 26,603           | 35,274          | 10,1     | 39,2301  | 17,653              | 230,7               | -                                  | X                       | 0                            | 0,14                                          |
| 289     | 300          | 26,603           | 35,274          | 302,3    | 39,0917  | 15,516              | 201,2               | -                                  | X                       | 0,08                         | 3,16                                          |
| 289     | 402          | 26,603           | 35,274          | 404,7    | 38,9906  | 14,822              | 192,7               | -                                  | X                       | 0,14                         | 4,37                                          |
| 289     | 801          | 26,6             | 35,27           | 809,3    | 39,02    | 14,6                | 206,9               | 8,08E+06                           | X                       | 0,11                         | 3,27                                          |
| 290     | 5            | 27,5             | 34,33           | 5,4      | 38,9699  | 17,247              | 232,2               | -                                  | X                       | 0                            | 0                                             |
| 290     | 2565         | 27,5             | 34,33           | 2600,2   | 38,7528  | 13,93               | 189,6               | 4,04E+07                           | X                       | 0,17                         | 4,71                                          |
| 291     | 5            | 33               | 34,06           | 5,3      | 39,1516  | 18,193              | 228,9               | 3,27E+08                           | X                       | 0                            | 0                                             |
| 291     | 2453         | 33               | 34,06           | 2485,9   | 38,7859  | 14,026              | 186,9               | 7,94E+07                           | X                       | 0,18                         | 4,7                                           |
| 292     | 7            | 35,17            | 33,99           | 6,9      | 38,9753  | 18,754              | 229,2               | 8,15E+08                           | X                       | 0                            | 0                                             |
| 292     | 52           | 35,17            | 33,99           | 52,3     | 39,03    | 17,91               | 224,5               | 3,54E+08                           | X                       | 0,01                         | 0,15                                          |
| 292     | 102          | 35,17            | 33,99           | 102,5    | 39,15    | 18                  | 223,4               | 4,34E+08                           | X                       | 0,01                         | 0,27                                          |
| 292     | 402          | 35,17            | 33,99           | 405,7    | 38,87    | 14,31               | 178                 | 1,27E+08                           | X                       | 0,22                         | 5,45                                          |
| 292     | 1659         | 35,17            | 33,99           | 1677,9   | 38,78    | 13,89               | 108,8               | 5,62E+07                           | X                       | 0,18                         | 4,89                                          |
| 293     | 6            | 34,42            | 34              | 6,6      | 39,1667  | 18,751              | 226,1               | 2,96E+08                           | X                       | 0                            | 0                                             |
| 293     | 2013         | 34,42            | 34              | 2037,8   | 38,7881  | 13,96               | 185,3               | 8,35E+07                           | X                       | 0,18                         | 4,71                                          |
| 294     | 6            | 31               | 33,7            | 6,2      | 39,0284  | 18,138              | 228,8               | 2,74E+08                           | X                       | 0                            | 0,07                                          |
| 294     | 2464         | 31               | 33,7            | 2497     | 38,7826  | 14,016              | 188,2               | 5,75E+07                           | X                       | 0,19                         | 4,79                                          |
| 296     | 5            | 28,77            | 33,58           | 5,4      | 38,7     | 17,47               | 231,3               | 2,55E+08                           | -                       | 0,01                         | 0,06                                          |
| 296     | 51           | 28,77            | 33,58           | 51,3     | 38,79    | 17,37               | 230,2               | 2,66E+08                           | -                       | 0                            | 0,06                                          |
| 296     | 150          | 28,77            | 33,58           | 151,5    | 39,03    | 16,23               | 207,4               | 1,58E+08                           | -                       | 0,03                         | 1,52                                          |
| 296     | 502          | 28,77            | 33,58           | 506,7    | 38,81    | 13,97               | 175,4               | 7,26E+07                           | -                       | 0,24                         | 5,89                                          |
| 296     | 2914         | 28,77            | 33,58           | 2956,3   | 38,77    | 14,07               | 187,7               | 3,96E+07                           | -                       | 0,18                         | 4,85                                          |
| 297     | 4190         | 26,01            | 34,39           | 4262,8   | 38,75    | 14,22               | 193,1               | 2,88E+06                           | -                       | 0,16                         | 4,75                                          |
| 298     | 5            | 24,33            | 34,5            | 5,7      | 38,5803  | 17,122              | 235,7               | -                                  | X                       | 0                            | 0                                             |
| 298     | 25           | 24,333           | 34,5            | 25,5     | 38,6785  | 16,605              | -                   | -                                  | X                       | -                            | -                                             |
| 298     | 251          | 24,333           | 34,5            | 253,5    | 39,0166  | 14,889              | 196,1               | 4,94E+07                           | X                       | 0,11                         | 4,1                                           |
| 298     | 803          | 24,333           | 34,5            | 810,8    | 38,815   | 13,939              | 186,2               | 6,45E+07                           | X                       | 0,19                         | 5,08                                          |
| 298     | 1505         | 24,333           | 34,5            | 1521,7   | 38,7604  | 13,78               | 188,1               | 4,66E+07                           | X                       | 0,17                         | 4,88                                          |
| 298     | 3266         | 24,333           | 34,5            | 3316,1   | 38,7376  | 13,992              | 192,5               | 3,97E+07                           | X                       | 0,16                         | 4,69                                          |
| 299     | 6            | 22,5             | 35              | 6,3      | 38,7433  | 16,791              | 233,6               | -                                  | X                       | 0                            | 0,02                                          |
| 299     | 3106         | 22,5             | 35              | 3152,6   | 38,7368  | 13,954              | 191,9               | -                                  | X                       | 0,18                         | 4,51                                          |
| 301     | 3497         | 21,48            | 35,23           | 3552,6   | 38,7433  | 16,447              | -                   | -                                  | X                       | 1,29                         | 0                                             |
| 302     | 2948         | 20,35            | 35,06           | 2990,8   | 38,7258  | 13,915              | 192,6               | 9,86E+06                           | X                       | 0,18                         | 4,67                                          |
| 303     | 3565         | 19               | 35,06           | 3622     | 38,72    | 14,01               | 199,4               | 4,38E+06                           | -                       | 0,16                         | 4,43                                          |
| 305     | 6            | 17,25            | 35,6            | 6,3      | 38,34    | 17,05               | 237                 | 2,35E+08                           | -                       | 0,01                         | 0                                             |

|     |      |        |       |        |         |        |       |          |   |      |      |
|-----|------|--------|-------|--------|---------|--------|-------|----------|---|------|------|
| 305 | 201  | 17,25  | 35,6  | 203    | 39,06   | 15,4   | 202,9 | 6,49E+07 | - | 0,1  | 2,76 |
| 305 | 502  | 17,25  | 35,6  | 506,2  | 38,88   | 14,25  | 188,7 | 4,82E+07 | - | 0,19 | 4,83 |
| 305 | 2008 | 17,25  | 35,6  | 2032,5 | 38,73   | 13,8   | 193,6 | 3,00E+07 | - | 0,18 | 4,59 |
| 305 | 3511 | 17,25  | 35,6  | 3566,6 | 38,73   | 14     | 198,2 | 1,81E+07 | - | 0,17 | 4,37 |
| 306 | 3424 | 19     | 36,5  | 3478,1 | 38,73   | 13,98  | 196,6 | 3,56E+07 | - | 0,19 | 4,44 |
| 307 | 3283 | 19,3   | 37,9  | 3334,5 | 38,73   | 13,96  | 196   | 9,18E+06 | - | 0,15 | 4,51 |
| 308 | 25   | 18,999 | 38,5  | 25,5   | 38,56   | 16,09  | -     | 2,09E+08 | - | -    | -    |
| 308 | 150  | 18,999 | 38,5  | 151,5  | 38,855  | 14,767 | -     | 1,34E+08 | X | 0,08 | 3,57 |
| 308 | 502  | 18,999 | 38,5  | 506,7  | 38,8617 | 14,182 | -     | 7,68E+07 | X | 0,18 | 4,87 |
| 308 | 1505 | 18,999 | 38,5  | 1522,1 | 38,7447 | 13,782 | -     | 3,95E+07 | X | 0,18 | 4,74 |
| 308 | 3441 | 18,999 | 38,5  | 3496,5 | 38,7323 | 13,999 | 196   | 3,38E+07 | X | 0,17 | 4,56 |
| 309 | 5    | 18,8   | 39,5  | 5,2    | 38,7719 | 16,089 | 242,5 | -        | X | 0    | 0    |
| 309 | 791  | 18,8   | 39,5  | 799,4  | 38,743  | 13,663 | 188,3 | 1,23E+07 | X | 0,22 | 5,11 |
| 310 | 950  | 19,16  | 40,16 | 959,8  | 38,7203 | 13,481 | 208,3 | 1,01E+08 | X | 0,18 | 4,47 |
| 313 | 1083 | 18     | 41,25 | 1094,4 | 38,7283 | 13,227 | 208   | -        | X | 0,13 | 3,91 |
| 314 | 6    | 18,41  | 38,5  | 6,1    | 38,49   | 15,73  | 241,7 | 2,20E+08 | - | 0    | 0    |
| 314 | 201  | 18,41  | 38,5  | 202,4  | 38,97   | 14,86  | 196,9 | 8,85E+07 | - | 0,11 | 3,8  |
| 314 | 502  | 18,41  | 38,5  | 506,6  | 38,85   | 14,17  | 188,7 | 6,31E+07 | - | 0,19 | 5    |
| 314 | 1505 | 18,41  | 38,5  | 1522,1 | 38,74   | 13,78  | 188,2 | 3,52E+07 | - | 0,18 | 4,78 |
| 314 | 2850 | 18,41  | 38,5  | 2891,1 | 38,73   | 13,89  | 194,6 | 3,14E+07 | - | 0,16 | 4,59 |
| 316 | 6    | 11,5   | 38,6  | 5,9    | 37,2211 | 16,16  | 248   | -        | X | 0,01 | 0    |
| 316 | 26   | 11,5   | 38,6  | 26,6   | 37,5403 | 14,816 | 250,3 | -        | X | 0,02 | 0,01 |
| 316 | 201  | 11,5   | 38,6  | 202,5  | 38,62   | 14,17  | 181,9 | -        | X | 0,24 | 5,65 |
| 316 | 503  | 11,5   | 38,6  | 507,1  | 38,6712 | 13,78  | 245,1 | -        | X | 0,01 | 0,04 |
| 316 | 1004 | 11,5   | 38,6  | 1013,7 | 38,57   | 13,43  | 184,4 | -        | X | 0,32 | 7,04 |
| 316 | 1629 | 11,5   | 38,6  | 1648,1 | 38,5099 | 13,281 | 109,7 | 7,26E+07 | X | 0,35 | 7,63 |
| 317 | 5    | 11,75  | 39,22 | 5,7    | 37,3228 | 16,38  | 243,9 | -        | X | 0    | 0    |
| 317 | 3218 | 11,75  | 39,22 | 3267,9 | 38,493  | 13,488 | 189,3 | 7,53E+06 | X | 0,37 | 7,94 |
| 319 | 2853 | 11,3   | 40,3  | 2895,6 | 38,5026 | 13,465 | 186,4 | 5,34E+06 | X | 0,4  | 7,59 |
| 320 | 6    | 10,61  | 38,75 | 6,3    | 37,6223 | 16,162 | -     | -        | X | 0    | 0    |
| 320 | 2450 | 10,61  | 38,75 | 2483,8 | 38,4779 | 13,288 | -     | -        | X | 0,4  | 8,02 |
| 321 | 26   | 9,4    | 38,25 | 25,9   | 37,7775 | 14,764 | 252,2 | -        | X | 0    | 0,17 |
| 321 | 252  | 9,4    | 38,25 | 253,9  | 38,702  | 14,03  | 175,8 | -        | X | 0,32 | 6,36 |
| 321 | 602  | 9,4    | 38,25 | 608,3  | 38,6775 | 13,777 | 177,6 | -        | X | 0,35 | 6,52 |
| 321 | 1003 | 9,4    | 38,25 | 1013,5 | 38,5733 | 13,41  | 185   | -        | X | 0,39 | 7,23 |
| 321 | 1533 | 9,4    | 38,25 | 1550,4 | 38,4732 | 13,118 | 194   | 7,30E+07 | X | 0,44 | 8,06 |
| 322 | 2634 | 8,2    | 38,2  | 2671,6 | 38,47   | 13,29  | 195,3 | 9,59E+06 | - | 0,36 | 7,95 |
| 324 | 2828 | 5,6    | 38,65 | 2868,9 | 38,47   | 13,33  | 195,3 | 3,83E+07 | - | 0,35 | 8,1  |
| 326 | 6    | 4,5    | 38,45 | 5,8    | 37,1848 | 17,23  | 242,3 | -        | X | 0    | 0    |

|     |      |        |       |        |         |        |       |          |   |      |      |
|-----|------|--------|-------|--------|---------|--------|-------|----------|---|------|------|
| 326 | 2712 | 4,5    | 38,45 | 2751,3 | 38,4854 | 13,332 | 198,2 | 7,53E+07 | X | 0,38 | 7,98 |
| 327 | 7    | 3,2    | 38,1  | 6,7    | 37,2311 | 17,283 | 238,8 | -        | X | 0,01 | 0    |
| 327 | 402  | 3,2    | 38,1  | 405,2  | 38,48   | 13,231 | 185,2 | -        | X | 0,39 | 7,85 |
| 327 | 1003 | 3,2    | 38,1  | 1013,4 | 38,4875 | 13,117 | 185,6 | -        | X | 0,39 | 8,11 |
| 327 | 2006 | 3,2    | 38,1  | 2031,1 | 38,4761 | 13,205 | 196,3 | -        | X | 0,36 | 7,65 |
| 327 | 2757 | 3,2    | 38,1  | 2797,1 | 38,4838 | 13,335 | 198,4 | 8,35E+06 | X | 0,39 | 7,84 |
| 329 | 5    | 2      | 37,9  | 5,6    | 37,3773 | 17,021 | 239,9 | 3,67E+08 | X | 0    | 0    |
| 329 | 2709 | 2      | 37,9  | 2748   | 38,4826 | 13,324 | 199,2 | 5,89E+07 | X | 0,36 | 7,9  |
| 331 | 6    | 0      | 37,05 | 5,9    | 36,8334 | 17,109 | 244   | 2,74E+08 | X | 0,03 | 0,03 |
| 331 | 2690 | 0      | 37,05 | 2727,8 | 38,4836 | 13,322 | 200,6 | 4,93E+07 | X | 0,38 | 8,64 |
| 333 | 6    | -3,572 | 36,1  | 6,4    | 36,53   | 17,018 | 246,2 | 4,26E+08 | X | 0,05 | 0    |
| 333 | 101  | -3,572 | 36,1  | 102,5  | 37,1764 | 14,755 | 210,6 | -        | X | 0,29 | 4,91 |
| 333 | 402  | -3,572 | 36,1  | 405,4  | 38,4902 | 13,253 | 171,9 | -        | X | 0,48 | 9,78 |
| 333 | 803  | -3,572 | 36,1  | 810,7  | 38,4993 | 13,149 | 183,6 | -        | X | 0,45 | 9,33 |
| 333 | 1684 | -3,572 | 36,1  | 1703,8 | 38,474  | 13,144 | 192,6 | 5,75E+07 | X | 0,45 | 8,9  |
| 334 | 5    | -3,55  | 36,1  | 4,6    | 36,51   | 17,42  | 242,1 | 4,00E+08 | - | 0,01 | 0,01 |
| 334 | 1201 | -3,55  | 36,1  | 1213,6 | 38,4712 | 13,069 | 189,5 | 1,00E+08 | X | 0,38 | 8,99 |
| 336 | 788  | -3,55  | 36    | 795,9  | 38,4696 | 13,006 | 186,6 | 5,22E+07 | X | 0,4  | 9,05 |

| Sample | OTUs | Shannon index |
|--------|------|---------------|
| 290-E  | 59   | 3,504         |
| 291-E  | 62   | 3,389         |
| 292-E  | 59   | 3,429         |
| 293-E  | 51   | 3,186         |
| 294-E  | 63   | 3,431         |
| 298-E  | 68   | 3,295         |
| 299-E  | 60   | 3,297         |
| 309-E  | 32   | 2,911         |
| 316-E  | 61   | 3,735         |
| 317-E  | 59   | 3,606         |
| 320-E  | 64   | 3,502         |
| 326-E  | 53   | 3,523         |
| 327-E  | 48   | 3,421         |
| 329-E  | 46   | 3,298         |
| 331-E  | 62   | 3,378         |
| 333-E  | 51   | 3,042         |
| 290-B  | 44   | 2,9           |
| 291-B  | 55   | 3,149         |
| 293-B  | 30   | 2,889         |
| 294-B  | 44   | 2,539         |
| 299-B  | 45   | 3,135         |
| 301-B  | 24   | 1,47          |
| 302-B  | 14   | 1,29          |
| 309-B  | 45   | 3,349         |
| 310-B  | 51   | 3,341         |
| 313-B  | 71   | 3,676         |
| 316-B  | 51   | 2,799         |
| 317-B  | 69   | 3,557         |
| 319-B  | 51   | 3,484         |
| 320-B  | 40   | 3,233         |
| 326-B  | 29   | 2,907         |
| 327-B  | 47   | 3,339         |
| 329-B  | 40   | 3,216         |
| 331-B  | 62   | 3,572         |
| 333-B  | 49   | 3,29          |
| 334-B  | 37   | 2,945         |
| 336-B  | 47   | 3,075         |
