# Supplementary figures and images for: Biogeography of planktonic bacterial communities across the whole Mediterranean Sea
Source: Copernicus journal article supplement (doi:10.5194/os-9-585-2013), 2013-07-08

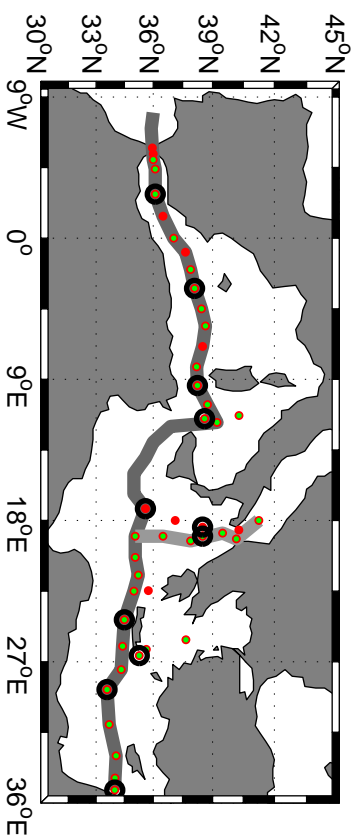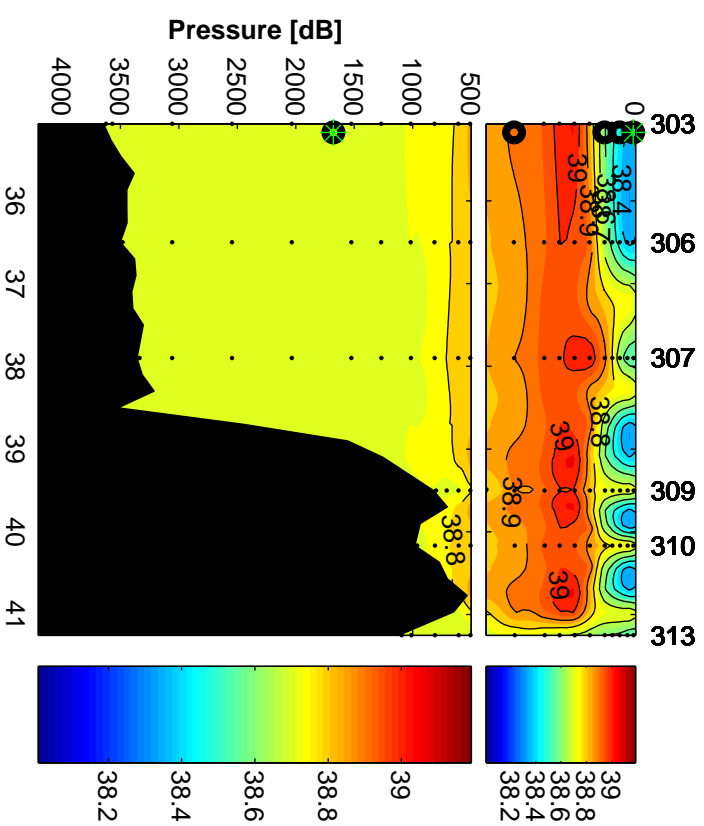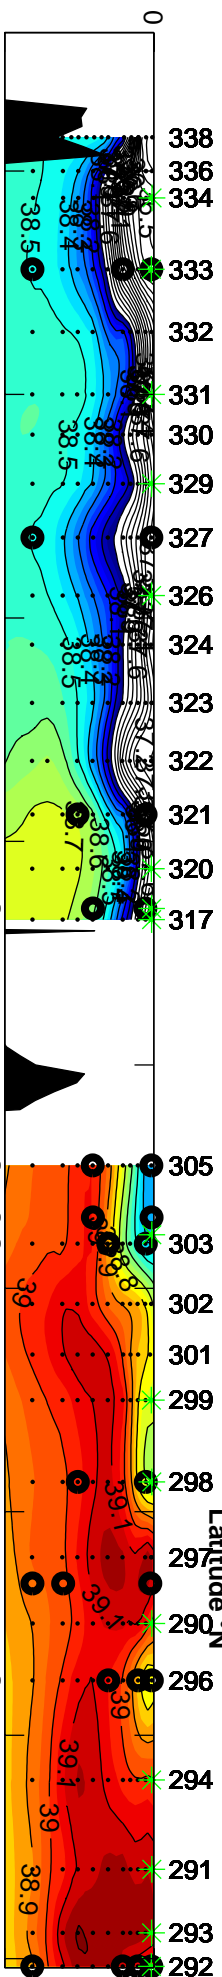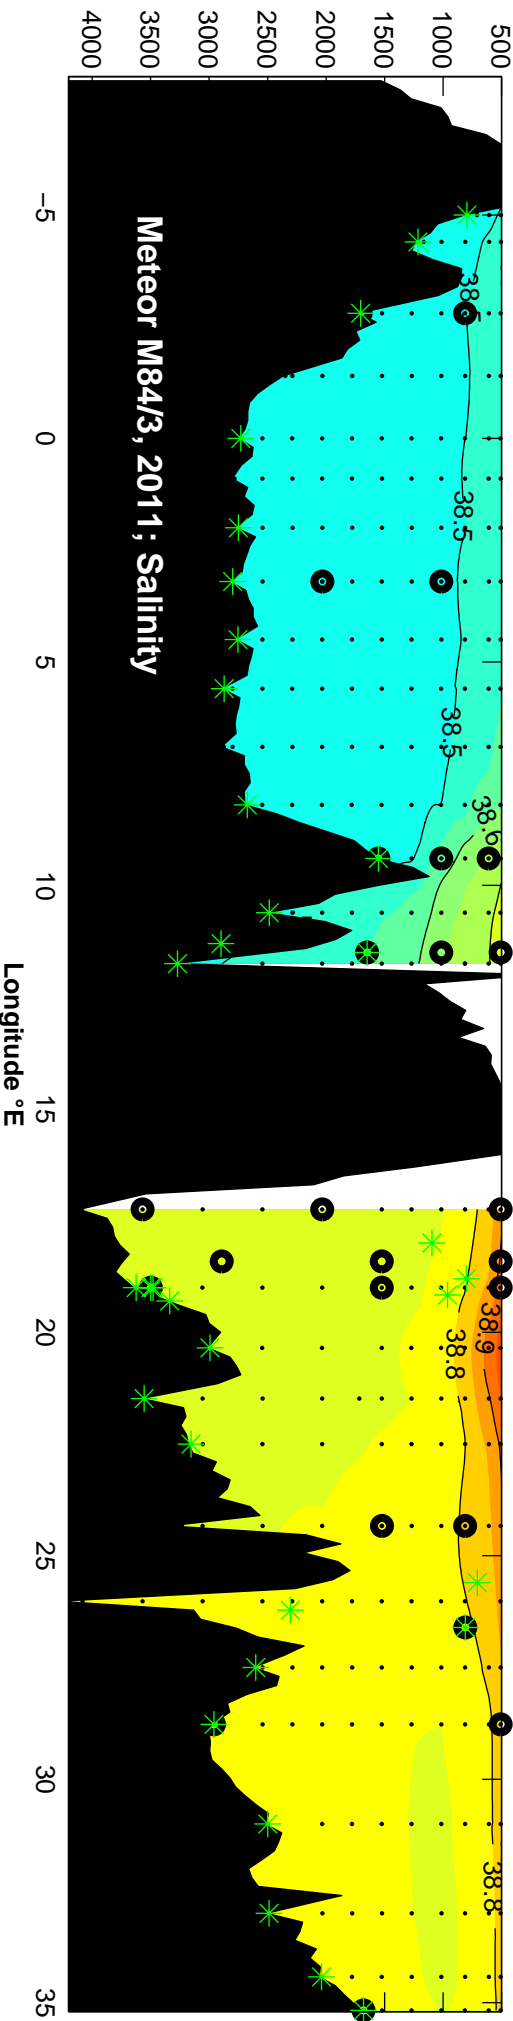

Supplement: Supplementary file 3 [file Mapelli et al.-Supplementary Fig 1.pdf › SUPPLEMENTARY FIGURES AND TABLES/Mapelli et al.-Supplementary Fig 1.pdf]
